# Supplementary material for: Effect of ultraprocessed food intake on cardiometabolic risk is mediated by diet quality: a cross-sectional study
Source: PubMed Central journal article supplement (PMC8258022; doi:10.1136/bmjnph-2020-000225), 2021-04-07

**Supplementary Data****The Effect of Ultra-processed Food Intake on Cardiometabolic Risk is Mediated by Diet Quality.**

Authors:

Jennifer Griffin RD. Nutrition & Dietetic Research Group, Department of Metabolism, Digestion and Reproduction, Faculty of Medicine, Imperial College London, UK.

Anwar H. AlBaloul: Nutrition & Dietetic Research Group, Department of Metabolism, Digestion and Reproduction, Faculty of Medicine, Imperial College London, UK.

Aleksandra Kopytek: Clinical Trial Administrator, Nutrition & Dietetic Research Group, Department of Metabolism, Digestion and Reproduction, Faculty of Medicine, Imperial College London, UK.

Paul Elliott MBBS, PhD, FMedSci: Department of Epidemiology and Biostatistics, School of Public Health, Imperial College London, UK

Gary Frost PhD, RD : Nutrition & Dietetic Research Group, Department of Metabolism, Digestion and Reproduction, Faculty of Medicine, Imperial College London, UK

| <b>Supplementary Table 1.</b>                                                                                           |           | <b>Study Population Characteristics</b> |               |              |                 |
|-------------------------------------------------------------------------------------------------------------------------|-----------|-----------------------------------------|---------------|--------------|-----------------|
|                                                                                                                         |           | <b>Male</b>                             | <b>Female</b> | <b>All</b>   | <b>p-value*</b> |
| <b>Total</b>                                                                                                            | n (%)     | 5475 (60.8)                             | 3534 (39.2)   | 9009 (100.0) | 0.031           |
| <b>Age (y)</b>                                                                                                          | Mean (SD) | 42.0 (8.8)                              | 39.3 (9.4)    | 40.9 (9.2)   | < 0.001         |
| <b>NOVA 4 Intake (% Kcal)</b>                                                                                           | Mean (SD) | 58.4 (11.5)                             | 58.1 (11.8)   | 58.3 (11.6)  | 0.298           |
| <b>BMI Category</b>                                                                                                     |           |                                         |               |              |                 |
| Underweight (< 18.5kgm <sup>2</sup> )                                                                                   | n (%)     | 4 (0.07)                                | 35 (1.0)      | 39 (0.4)     | 0.368           |
| Healthy Weight (18.5 – 24.9 kgm <sup>2</sup> )                                                                          |           | 1140 (20.8)                             | 1726 (48.8)   | 2866 (31.8)  | <0.001          |
| Overweight (25.0 – 29.9 kgm <sup>2</sup> )                                                                              |           | 3045 (55.6)                             | 1227 (34.7)   | 4272 (47.4)  | 0.028           |
| Obese (≥ 30 kgm <sup>2</sup> )                                                                                          |           | 1286 (23.5)                             | 546 (15.4)    | 1832 (20.3)  | 0.194           |
| <b>Ethnicity</b>                                                                                                        |           |                                         |               |              |                 |
| White                                                                                                                   | n (%)     | 5302 (96.8)                             | 3457 (97.8)   | 8759 (97.2)  | 0.930           |
| Other                                                                                                                   |           | 162 (2.9)                               | 71 (2.0)      | 233 (2.6)    | 0.684           |
| Prefer not to say                                                                                                       |           | 11 (0.3)                                | 6 (0.2)       | 17 (0.2)     | 0.887           |
| <b>Education</b>                                                                                                        |           |                                         |               |              |                 |
| Left School Before GCSE                                                                                                 | n (%)     | 241 (4.4)                               | 110 (3.1)     | 351 (3.9)    | 0.635           |
| GCSE/Equivalent                                                                                                         |           | 2095 (38.3)                             | 1235 (34.9)   | 3330 (37.0)  | 0.613           |
| A Level/Equivalent or Higher                                                                                            |           | 3139 (57.3)                             | 2189 (62.0)   | 5328 (59.1)  | 0.667           |
| <b>Household Income</b>                                                                                                 |           |                                         |               |              |                 |
| < £25,999                                                                                                               | n (%)     | 211 (3.8)                               | 534 (15.1)    | 745 (8.3)    | 0.009           |
| £26,000 - £37,999                                                                                                       |           | 880 (16.1)                              | 769 (21.7)    | 1649 (18.3)  | 0.362           |
| £38,000 - £57,999                                                                                                       |           | 2459 (44.9)                             | 1156 (32.7)   | 3615 (40.1)  | 0.166           |
| £58,000 - £77,999                                                                                                       |           | 1378 (25.1)                             | 706 (20.0)    | 2084 (23.1)  | 0.448           |
| > £78,000                                                                                                               |           | 547 (10.1)                              | 369 (10.5)    | 916 (10.2)   | 0.930           |
| *Chi-square Test ~ categorical variables, Students T-test ~ continuous variables. Significance accepted as $p < 0.05$ . |           |                                         |               |              |                 |

Supplementary Material, Figure 1. Participant Flow Chart

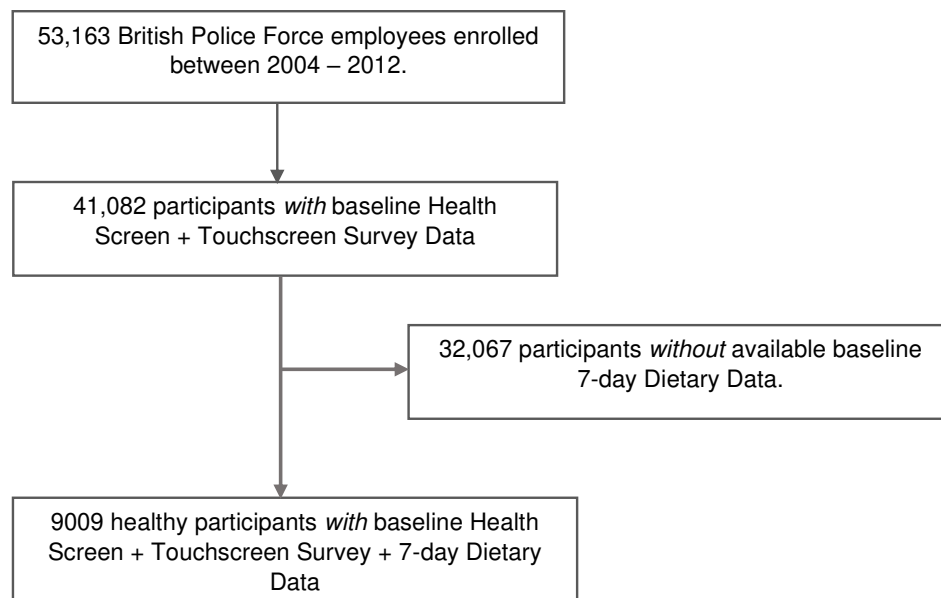

Supplement: bmjnph-2020-000225supp001.pdf [file bmjnph-2020-000225supp001.pdf]
